# Non-cyanobacterial diazotrophs dominate dinitrogen fixation in biological soil crusts during early crust formation.

**Charles Pepe-Ranney<sup>1</sup>, Chantal Koechli<sup>2</sup>, Ruth Potrafka<sup>3</sup>, Cheryl Andam<sup>2</sup>, Erin Eggleston<sup>2</sup>, Ferran Garcia-Pichel<sup>3</sup>, Daniel H Buckley<sup>1,\*</sup>**

<sup>1</sup>*Cornell University, Department of Crop and Soil Sciences, Ithaca, NY, USA*

<sup>2</sup>*Cornell University, Department of Microbiology, Ithaca, NY, USA*

<sup>3</sup>*Arizona State University, School of Life Sciences, Tempe, AZ 85287, USA.*

Correspondence\*:

Daniel H Buckley

Cornell University, Department of Crop and Soil Sciences, Ithaca, NY, USA,

# 1 ABSTRACT

Biological soil crusts (BSC) are key components of ecosystem productivity in arid lands and they cover a substantial fraction of the terrestrial surface. In particular, BSC N<sub>2</sub>-fixation contributes significantly to the nitrogen (N) budget of arid land ecosystems. In mature crusts, N<sub>2</sub>-fixation is largely attributed to heterocystous cyanobacteria, however, early successional crusts also fix N<sub>2</sub> but possess few N<sub>2</sub>-fixing cyanobacteria and this suggests that microorganisms other than cyanobacteria mediate N<sub>2</sub>-fixation during the critical early stages of BSC development. DNA stable isotope probing (DNA-SIP) with <sup>15</sup>N<sub>2</sub> revealed that *Clostridiaceae* and *Proteobacteria* are the most common microorganisms that assimilate <sup>15</sup>N in early successional crusts. The low abundance of these groups in BSC may explain why these heterotrophic diazotrophs have not previously been characterized. Diazotrophs play a critical role in BSC formation and characterization of these organisms represents a crucial step towards understanding how anthropogenic change will affect the formation and ecological function of BSC in arid ecosystems.

**keywords:** Biological sciences / Environmental microbiology / Microbial ecology / Microbiology / Soil microbiology

# 2 INTRODUCTION

Biological soil crusts (BSC) are specialized microbial communities that form at the soil surface in arid environments and fill a variety of important ecological functions. BSC occupy plant interspaces and cover a wide, global geographic range (Garcia-Pichel *et al.*, 2003a). For example, the ground cover of BSC on the Colorado Plateau has been measured as high as 80% by remote sensing (Karnieli *et al.*, 2003). The global biomass of BSC cyanobacteria alone is estimated at 54 x 10<sup>12</sup> g C (Garcia-Pichel *et al.*, 2003a). N<sub>2</sub>-fixation is responsible for significant input of nitrogen (N) to arid environments comprising the dominant source of new ecosystem N in the vast majority of arid ecosystems, while atmospheric N deposition is a dominant source of N in a minority of sites (Evans and Belnap, 1999). BSC N<sub>2</sub>-fixation is a major component of this input (Belnap, 2003). Interestingly, much of this fixed N is exported from the crusts in dissolved form with percolating or runoff water and little is lost to volatilization (Johnson *et al.*, 2007). The presence of BSC is positively correlated with vascular plant survival due in part to BSC ecosystem N contributions (for review of BSC-vascular plant interactions see Belnap *et al.* (2003)). These microbial ecosystems are not immune to climate change and changes in

precipitation and temperature could alter BSC microbial community structure/membership and possibly BSC diazotroph diversity and N<sub>2</sub>-fixation (Garcia-Pichel *et al.*, 2013).

Molecular studies of BSC microbial diversity include explorations of the vertical profile of BSC communities (Garcia-Pichel *et al.*, 2003b), surveys of *nifH* gene diversity (Steppe *et al.*, 1996; Yeager *et al.*, 2004, 2006, 2012), and next-generation-sequencing (NGS) enabled studies of SSU rRNA genes in BSC sampled across wide geographic ranges (Garcia-Pichel *et al.*, 2013; Steven *et al.*, 2013). Early successional BSC are often described as "light" in appearance relative to "dark" mature BSC (Belnap, 2002; Yeager *et al.*, 2004) because the non-motile heterocystous cyanobacteria that are secondary colonizers produce large amounts of sunscreen compounds that reduce soil albedo. Non-heterocystous, motile cyanobacteria (e.g. *Microcoleus vaginatus* or *M. steenstrupii*) are pioneer colonizers and abundant in all types of BSC (Yeager *et al.*, 2004; Garcia-Pichel *et al.*, 2013). N<sub>2</sub>-fixing heterocystous cyanobacteria (e.g. *Scytonema*, *Spirirestis*, and *Nostoc*, Yeager *et al.* (2006, 2012)) increase in abundance during crust development and are more abundant in mature crusts. Heterocystous cyanobacteria are numerically dominant in surveys of BSC *nifH* gene diversity (Yeager *et al.*, 2004, 2006, 2012). For example, 89 percent of 693 *nifH* sequences derived from Colorado Plateau and New Mexico BSC samples were attributed to heterocystous cyanobacteria (Yeager *et al.*, 2006). Other *nifH* sequences recovered from BSC are attributed to alpha-, beta-, and gamma- *Proteobacteria*, as well as a *nifH* clade that includes diverse anaerobes such as clostridia, sulfate reducing bacteria, and anoxygenic phototrophs (Steppe *et al.*, 1996; Yeager *et al.*, 2006).

Two lines of evidence suggest that nitrogen fixers other than phototrophs are important in early-successional crusts. First, the contributions of early successional BSC to N<sub>2</sub>-fixation in arid ecosystems may have been systematically under-estimated. The high abundance of heterocystous cyanobacteria at the surface of mature crusts, where ARA rates are often maximal, is generally taken as evidence that BSC N<sub>2</sub>-fixation occurs primarily in mature crusts and is dominated by heterocystous cyanobacteria. However, rates of BSC N<sub>2</sub>-fixation are typically determined by areal measurements made at the crust surface with the acetylene reduction assay (ARA) and vary significantly across samples and studies (Evans and Lange, 2001). The reasons for inter-site and inter-study variability are complex and likely include the spatial heterogeneity of BSC (Evans and Lange, 2001). The ARA assay is also subject to methodological artifacts that can complicate comparisons between samples that differ in their physical and biological characteristics (see Belnap (2001) for review). In particular, N<sub>2</sub>-fixation in early successional BSC is maximal below the crust surface (Johnson *et al.*, 2005) and hence diffusional limitation (of both acetylene and ethylene) across the crust surface can cause severe underestimates if they do not allow for sufficiently long incubation times (Johnson *et al.*, 2005). If BSC N<sub>2</sub>-fixation is

instead estimated by integrating rates across a depth profile (which eliminates constraints from diffusional limitation), then total rates of N<sub>2</sub>-fixation do not differ significantly between early successional and mature BSC (Johnson *et al.*, 2005). This result suggests that diazotrophs other than heterocystous cyanobacteria may be important contributors to N<sub>2</sub>-fixation in early successional BSC communities as early successional BSC possess few heterocystous cyanobacteria and these are present near the crust surface. Second, the bare soils that are colonized during the process of early crust formation are unconsolidated and oligotrophic in many respects, with much lower N content than adjacent crusts (Beraldi-Campesi *et al.*, 2009), and the cyanobacteria that are typical colonization pioneers (*Microcoleus spp.*, Garcia-Pichel and Wojciechowski (2009)), are unable to fix nitrogen as they lack that genetic capacity (Starkenbourg *et al.*, 2011; Rajeev *et al.*, 2013).

To determine the agency of nitrogen fixation in early developmental crusts, we conducted <sup>15</sup>N<sub>2</sub> DNA stable isotope probing (DNA-SIP) experiments with early successional Colorado Plateau BSC conspicuously devoid of significant surface populations of heterocystous cyanobacteria. DNA-SIP with <sup>15</sup>N<sub>2</sub> has not been previously attempted with BSC. DNA-SIP provides an accounting of *active* diazotrophs on the basis of <sup>15</sup>N<sub>2</sub> assimilation into DNA whereas *nifH* clone libraries merely account for microbes with the genomic potential for N<sub>2</sub>-fixation. Further, we investigate the distribution of these active diazotrophs in surveys of microbial diversity conducted on BSC over a range of spatial scales and soil types (Garcia-Pichel *et al.*, 2013; Steven *et al.*, 2013).

### 3 MATERIALS AND METHODS

#### 3.1 BSC SAMPLING AND INCUBATION CONDITIONS

BSC samples were taken from the Green Butte site near Moab, Utah as previously described (site CP3, Beraldi-Campesi *et al.* (2009)). All samples were from early successional 'light' crusts as described by (Johnson *et al.*, 2005). Early successional BSC samples (37.5 cm<sup>2</sup>, average mass 35 g) were incubated in sealed chambers under controlled atmosphere and in 16h light/8h dark for 4 days. Crusts were sampled and transported while dry and wetted at initiation of the experiment. Treatments included an unlabeled control air headspace and <sup>15</sup>N<sub>2</sub> enriched air (>98% atom <sup>15</sup>N<sub>2</sub>) headspace. Samples were taken at 2 days and 4 days incubation. Acetylene reduction rates were measured daily. Acetylene reduction rates increased over the course of the experiment (0.8, 4.8, 8.8, and 14.5 μm m<sup>-2</sup> hr<sup>-1</sup> ethylene for days 1 through 4, respectively).

### 3.2 DNA EXTRACTION

95 DNA was extracted from 1 g of BSC. DNA from each sample was extracted using a MoBio  
96 PowerSoil DNA Isolation Kit (following manufacturers protocol, but substituting a 2 minute  
97 bead beating for the vortexing step), and then gel purified to select high molecular weight  
98 DNA (>4 kb) using a 1% low melt agarose gel and  $\beta$ -agarase I for digestion (manufacturer's  
99 protocol, NEB, M0392S). Extracts were quantified using PicoGreen nucleic acid quantification  
100 dyes (Molecular Probes).

### 3.3 FORMATION OF CSCL EQUILIBRIUM DENSITY GRADIENTS

101 CsCl density gradients were formed in 4.7 mL polyallomer centrifuge tubes filled with gradient  
102 buffer (15mM Tris-HCl, pH 8; 15mM EDTA; 15mM KCl) which contained 1.725 g/mL CsCl.  
103 CsCl density was checked with a digital refractometer as described below. A total of 2.5-5  $\mu$ g  
104 of DNA was added to each tube, and the tubes mixed, prior to centrifugation. Centrifugation  
105 was performed in a TLA-110 fixed angle rotor (Beckman Coulter) at 20C for 67 hours at 55,000  
106 rpm. (Buckley *et al.*, 2007). Centrifuged gradients were fractionated from bottom to top in 36  
107 equal fractions of 100  $\mu$ L, using a syringe pump as described previously (Buckley *et al.*, 2007).  
108 The density of each fraction was determined using using an AR200 refractometer modified to  
109 accommodate 5  $\mu$ L samples as described previously (Buckley *et al.*, 2007). DNA in each frac-  
110 tion was desalted on a filter plate (PALL, AcroPrep Advance 96 Filter Plate, Product Number  
111 8035), using four washes with 300  $\mu$ L TE per fraction. After each wash, the filter plate was  
112 centrifuged at 500xg for 10 minutes, with a final spin of 20 minutes. Purified DNA from each  
113 fraction was resuspended in 50  $\mu$ L of TE buffer.

### 3.4 PCR, LIBRARY NORMALIZATION AND DNA SEQUENCING

114 Barcoded PCR of bacterial and archaeal SSU rRNA genes was carried out using primer set  
115 515F/806R (Walters *et al.*, 2011) (primers purchased from Integrated DNA Technologies). The  
116 primer 806R contained an 8 bp barcode sequence, a "TC" linker, and a Roche 454 B sequencing  
117 adaptor, while the primer 515F contained the Roche 454 A sequencing adapter. Each 25  $\mu$ L  
118 reaction contained 1x PCR Gold Buffer (Roche), 2.5 mM MgCl<sub>2</sub>, 200  $\mu$ M of each of the four  
119 dNTPs (Promega), 0.5 mg/mL BSA (New England Biolabs), 0.3  $\mu$ M of each primers, 1.25  
120 U of Amplitaq Gold (Roche), and 8  $\mu$ L of template. Each sample was amplified in triplicate.  
121 Thermal cycling occurred with an initial denaturation step of 5 minutes at 95C, followed by  
122 40 cycles of amplification (20s at 95C, 20s at 53C, 30s at 72C), and a final extension step of  
123 5 min at 72C. Triplicate amplicons were pooled and purified using Agencourt AMPure PCR

purification beads, following manufacturers protocol. Once purified, amplicons were quantified using PicoGreen nucleic acid quantification dyes (Molecular Probes) and pooled together in equimolar amounts. Samples were sent to the Environmental Genomics Core Facility at the University of South Carolina (now Selah Genomics) where they were run on a Roche FLX 454 pyrosequencing machine (FLX-Titanium platform).

### 3.5 DATA ANALYSIS

**3.5.1 Sequence quality control** Sequences were initially screened by maximum expected errors at a specific read length threshold (Edgar, 2013) which has been shown to be as effective as denoising with respect to removing pyrosequencing errors. Specifically, reads were first truncated to 230 nucleotides (nt) (all reads shorter than 230 nt were discarded) and any read that exceeded a maximum expected error threshold of 1.0 was removed. After truncation and maximum expected error trimming, 91% of original reads remained. Forward primer and barcode were then removed from the high quality, truncated reads. Remaining reads were taxonomically annotated using the "UClust" taxonomic annotation framework in the QIIME software package (Caporaso *et al.*, 2010; Edgar, 2010) with cluster seeds from Silva SSU rRNA database (Pruesse *et al.*, 2007) 97% sequence identity OTUs as reference (release 111Ref). Reads annotated as "Chloroplast", "Eukaryota", "Archaea", "Unassigned" or "mitochondria" were culled from the dataset. Finally, reads were aligned to the Silva reference alignment provided by the Mothur software package (Schloss *et al.*, 2009) using the Mothur NAST aligner (DeSantis *et al.*, 2006). All reads that did not align to the expected amplicon region of the SSU rRNA gene were discarded. Quality control parameters removed 34,716 of 258,763 raw reads.

**3.5.2 Sequence clustering** Sequences were distributed into OTUs using the UParse methodology (Edgar, 2013). Specifically, OTU centroids (i.e. seeds) were identified using USearch on non-redundant reads sorted by count. The sequence identity threshold for establishing a new OTU centroid was 97%. After initial OTU centroid selection, select SSU rRNA gene sequences from Yeager *et al.* (2006) were added to the centroid collection. Specifically, Yeager *et al.* (2006) Colorado Plateau or Moab, Utah sequences were added which included the SSU rRNA gene sequences for *Calothrix* MCC-3A (accession DQ531700.1), *Nostoc commune* MCT-1 (accession DQ531903), *Nostoc commune* MFG-1 (accession DQ531699.1), *Scytonema hyalinum* DC-A (accession DQ531701.1), *Scytonema hyalinum* FGP-7A (accession DQ531697.1), *Spirirestis rafaensis* LQ-10 (accession DQ531696.1). Centroid sequences that matched selected Yeager *et al.* (2006) sequences with greater than 97% sequence identity were subsequently removed from the centroid collection as they were substituted with Yeager *et*



*al.* (2006) sequences. With USearch/UParse, potential chimeras are identified during OTU centroid selection and are not allowed to become cluster centroids effectively removing chimeras from the read pool. All quality controlled reads were then mapped to cluster centroids at an identity threshold of 97% again using USearch. A total of 95.6% of quality controlled reads could be mapped to centroids. Unmapped reads do not count towards sample counts and were removed from downstream analyses. The USearch software version for cluster generation was 7.0.1090. Garcia-Pichel *et al.* (2013) and Steven *et al.* (2013) sequences were quality screened by alignment coordinates (described above) and included as input to USearch for OTU centroid selection and subsequent mapping to OTU centroids.

**3.5.3 Phylogenetic analysis** Alignment of SSU rRNA genes was done with SSU-Align which is based on Infernal (Nawrocki *et al.*, 2009; Nawrocki and Eddy, 2013). Columns in the alignment that were not included in the SSU-Align covariance models or were aligned with poor confidence (less than 95% of characters in a position had posterior probability alignment scores of at least 95%) were masked for phylogenetic reconstruction. Additionally, the alignment was trimmed to coordinates such that all sequences in the alignment began and ended at the same positions. FastTree (Price *et al.*, 2010) was used to build the tree.

**3.5.4 Identifying OTUs that incorporated  $^{15}\text{N}$  into their DNA** DNA-SIP is a culture-independent approach towards defining identity-function connections in microbial communities (Radajewski and Murrell, 2001; Neufeld *et al.*, 2007; Buckley, 2011). Microbes are identified on the basis of isotope assimilation into DNA. As the buoyant density of a macromolecule is dependent on many factors in addition to stable isotope incorporation (e.g. G+C-content in nucleic acids (Youngblut and Buckley, n.d.)), labeled nucleic acids from one microbial population may have the same buoyant density as unlabeled nucleic acids from another. Therefore, it is imperative to compare results of isotopic labelling to results obtained with unlabeled controls where everything mimics the experimental conditions except that unlabeled substrates are used. By contrasting heavy gradient fractions from isotopically labeled samples relative to corresponding fractions from controls, the identities of microbes with labeled nucleic acids can be determined

We used an RNA-Seq differential expression statistical framework (Love *et al.*, 2014) to find OTUs enriched in heavy fractions of labeled gradients relative to corresponding density fractions in control gradients (for review of RNA-Seq differential expression statistics applied to microbiome OTU count data see McMurdie and Holmes (2014)). We use the term differential abundance (coined by McMurdie and Holmes (2014)) to denote OTUs that have different

proportion means across sample classes (in this case the only sample class is labeled:control). CsCl gradient fractions were categorized as "heavy" or "light". The heavy category denotes fractions with density values above 1.725 g/mL. Since we are only interested in enriched OTUs (labeled versus control), we used a one-sided Wald-test for differential abundance (the null hypothesis is that the labeled:control proportion mean ratio for an OTU is less than a selected threshold). P-values were corrected with the Benjamini and Hochberg method (Benjamini and Hochberg, 1995). We selected a log<sub>2</sub> fold change null threshold of 0.25 (or a labeled:control proportion mean ratio of 1.19). DESeq2 was used to calculate the moderated log<sub>2</sub> fold change of labeled:control proportion means and corresponding standard errors for the Wald-test (above). Fold change moderation allows for reliable ranking such that high variance and likely statistically insignificant fold changes are appropriately shrunk and subsequently ranked lower than they would be raw. Those OTUs that exhibit a statistically significant increase in proportion in heavy fractions from <sup>15</sup>N<sub>2</sub>-labeled samples relative to corresponding controls have increased significantly in buoyant density in response to <sup>15</sup>N<sub>2</sub> treatment; a response that is expected for N<sub>2</sub>-fixing organisms.

**3.5.5 Community and Sequence Analysis** BLAST searches were done with the "blastn" program from BLAST+ toolkit (Camacho *et al.*, 2009) version 2.2.29+. Default parameters were always employed and the BioPython (Cock *et al.*, 2009) BLAST+ wrapper was used to invoke the blastn program. Pandas (McKinney, 2012) and dplyr (Wickham and Francois, 2014) were used to parse and munge BLAST output tables.

Principal coordinate ordinations depict the relationship between samples at each time point (day 2 and 4). Bray-Curtis distances were used as the sample distance metric for ordination. The Phyloseq (McMurdie and Holmes, 2014) wrapper for Vegan (Oksanen *et al.*, 2013) (both R packages) was used to compute sample values along principal coordinate axes. GGplot2 (Wickham, 2009) was used to display sample points along the first and second principal axes. Adonis tests (Anderson, 2001) were done with default number of permutations (1000).

Rarefaction curves were created using bioinformatics modules in the PyCogent Python package (Knight *et al.*, 2007). Parametric richness estimates were made with CatchAll using only the best model for total OTU estimates (Bunge, 2010).

All code to take raw sequencing data through the presented figures (including download and processing of literature environmental datasets) can be found at:

[http://nbviewer.ipython.org/github/chuckpr/NSIP\\_data\\_analysis](http://nbviewer.ipython.org/github/chuckpr/NSIP_data_analysis)



## 4 RESULTS

### 4.1 DNA BUOYANT DENSITY CHANGES IN RESPONSE TO $^{15}\text{N}_2$

BSC were wetted and incubated for 4 days in transparent chambers with air containing either unlabeled  $\text{N}_2$  or 100 percent atom enriched  $^{15}\text{N}_2$ . The chambers were illuminated with 16h on/8h off cycles at an intensity of  $200 \mu\text{mol photons m}^{-2} \text{s}^{-1}$ , which is the equivalent of a overcast/rainy day.  $\text{N}_2$ -fixation as measured by ARA increased from 4.8 micromoles  $\text{m}^{-2} \text{d}^{-1}$  on day 2 to 14.5 micromoles  $\text{m}^{-2} \text{d}^{-1}$  on day 4. DNA was extracted for DNA-SIP at 2 and 4 days. CsCl gradient fractionation was used to separate the DNA into 36 gradient fractions on the basis of buoyant density. To characterize the distribution of SSU rRNA genes across density gradients at high resolution (HR-SIP), SSU rRNA gene amplicons were generated from 20 gradient fractions per gradient for both unlabeled controls and  $^{15}\text{N}_2$  labeled samples. Amplicon sequences from  $^{15}\text{N}_2$ -labeled samples and their corresponding unlabeled controls diverged specifically in heavy gradient fractions (Figure 1 and Figure S1) as assessed by Bray-Curtis dissimilarity (Bray and Curtis, 1957), and this result was significant (Adonis test (Anderson, 2001); p-value: 0.001,  $r^2$ : 0.18).

### 4.2 OTUS RESPONSIVE TO $^{15}\text{N}_2$ ARE PRIMARILY *PROTEOBACTERIA* AND *CLOSTRIDIACEAE*

OTUs that incorporated  $^{15}\text{N}$  into their DNA were detected by a differential change in their abundance within heavy gradient fractions of  $^{15}\text{N}_2$ -labeled samples relative to corresponding controls. Specifically, we compared OTU proportion means of heavy gradient fractions between labeled and control samples using statistics developed to detect differentially expressed genes in RNASeq data (Love *et al.*, 2014; McMurdie and Holmes, 2014). OTUs that incorporated  $^{15}\text{N}$  into DNA were identified by rejecting the null hypothesis that the proportion mean ratio (labeled:control) for an OTU in heavy fractions was below a pre-defined threshold (*i.e.* by assessing the difference in the relative abundance of OTUs between the heavy fractions of labeled and control gradients, see methods). The Benjamini-Hochberg method was used to adjust p-values (Benjamini and Hochberg, 1995) and a false discovery rate (FDR) of 0.10 was applied (this rate is the typical FDR threshold adopted during RNASeq analysis). A total of 2,127 and 2,160 OTUs were detected in days 2 and 4, respectively, and these OTUs were interrogated for evidence of  $^{15}\text{N}_2$ -labelling. Of these OTUs, only 499 and 563, respectively, passed a sparsity threshold applied to filter out OTUs with insufficient data for statistical analysis (see Love *et al.* (2014) for discussion of independent filtering). Of OTUs passing the sparsity criterion, 34 were be enriched significantly in heavy fractions relative to control and this result is specifically

250 expected for OTUs that have  $^{15}\text{N}$ -labeled DNA (*i.e.*  $^{15}\text{N}_2$  “responders”). Of these 34, 19 are an-  
 251 notated as *Firmicutes*, 12 as *Proteobacteria*, 2 as *Actinobacteria* and 1 as *Gemmatimonadetes*  
 252 (Figure 2, Figure 3). If the responder OTUs are ranked by descending proportion mean ratios, 8  
 253 the top 10 responders (*i.e.* those most enriched in the heavy fractions of labeled gradients) are  
 254 either *Firmicutes* (3 OTUs) or *Proteobacteria* (5 OTUs) (Figure 4). Centroids (seed sequences)  
 255 for strongly responding *Proteobacteria* OTUs all share high SSU rRNA gene sequence identity  
 256 (>98.48%, Table 1) with cultivars from genera known to possess diazotrophs including *Pseu-*  
 257 *domonas*, *Klebsiella*, *Shigella*, and *Ideonella*. None of the *Firmicutes* OTU centroids in the top  
 258 10 responders share greater than 97% SSU rRNA gene sequence identity with sequences in the  
 259 Living Tree Project (LTP) database of 16S rRNA gene sequences from type strains (release 115)  
 260 (see Table 1). OTUs that passed the sparsity threshold but were not classified as  $^{15}\text{N}$ -responsive  
 261 were subsequently tested with the null hypothesis that the OTU proportion mean ratio was  
 262 above the selected threshold. Rejecting the second null indicates conclusively that an OTU did  
 263 not incorporate  $^{15}\text{N}$  into biomass. There were 86 and 89 “non-responders” at days 2 and 4,  
 264 respectively. The  $^{15}\text{N}$  labelling of OTUs that did not pass sparsity or could not be classified as  
 265 either a responder or non-responder cannot be determined conclusively.

### 4.3 $^{15}\text{N}$ -RESPONSIVE OTUS ARE FOUND IN LOW ABUNDANCE IN AVAILABLE ENVIRONMENTAL BSC SSU RRNA GENE SURVEYS

266 In total 13 of the 34  $^{15}\text{N}$ -responsive OTUs have been observed previously in SSU rRNA gene  
 267 surveys of BSC communities (Figure 3, Figure S4). Eleven of the 19  $^{15}\text{N}$ -responsive *Firmi-*  
 268 *cutes* OTUs are members of the *Clostridiaceae*. Three  $^{15}\text{N}$ -responsive *Clostridiaceae* have been  
 269 observed in previous BSC SSU rRNA gene surveys. Two  $^{15}\text{N}$ -responsive *Clostridiaceae* were  
 270 found in “light” (*i.e.* early successional) crust during SSU rRNA gene sequence analysis of BSC  
 271 (Garcia-Pichel *et al.*, 2013), and one  $^{15}\text{N}$ -responsive *Clostridiaceae* OTU was found among the  
 272 “below crust” BSC SSU rRNA gene sequences described by Steven *et al.* (2013) (Figure 3).  
 273 Five  $^{15}\text{N}$ -responsive proteobacterial OTUs (Table 1) were detected previously in BSC sam-  
 274 ples (Garcia-Pichel *et al.*, 2013; Steven *et al.*, 2013) The  $^{15}\text{N}$ -responsive *Gemmatimonadetes*  
 275 OTU was observed in four Steven *et al.* (2013) samples and one  $^{15}\text{N}$ -responsive *Actinobacteria*  
 276 OTU was found in three Steven *et al.* (2013) samples. *Gemmatimonadetes* and *Actinobacteria*  
 277  $^{15}\text{N}$ -responsive OTUs were not observed in samples collected by Garcia-Pichel *et al.* (2013)

#### 4.4 COMPARISON OF SSU RRNA GENE SEQUENCES FROM DIFFERENT BSC SAMPLES

We compared the SSU rRNA gene sequences determined in this DNA-SIP experiment with two previous surveys of SSU rRNA gene amplicons from BSC communities (Garcia-Pichel *et al.*, 2013; Steven *et al.*, 2013). There were 3,079 OTUs (209,354 total sequences after quality control) in the DNA-SIP data, 3,203 OTUs (129,033 total sequences after quality control) in the Garcia-Pichel *et al.* (2013) study, and 2,481 OTUs (129,358 total sequences after quality control) in the Steven *et al.* (2013) study with a total of 4,340 OTUs across all three datasets. Of the total 4,340 OTU centroids established for this study, 445 have matches in the Living Tree Project (LTP) (a collection of SSU rRNA gene sequences for all sequenced type strains (Yarza *et al.*, 2008)) at or above a threshold of 97% sequence identity (LTP version 115). That is, 445 of 4,340 OTUs are closely related to known cultivars. The DNA-SIP data shares 56% OTUs with the Steven *et al.* (2013) data and 46% of OTUs with the Garcia-Pichel *et al.* (2013) data, while these latter two studies share 46% of their OTUs. This result suggests that low frequency OTUs likely remain undersampled in all datasets.

Sequencing of DNA subjected to CsCl fractionation is expected to sample a different subset of diversity than that sampled by sequencing unfractionated bulk DNA. For example, SIP enhances detection of OTUs that incorporate  $^{15}\text{N}$  into their DNA, and these OTUs will be overrepresented in the overall DNA-SIP sequence pool relative to their relative abundance in unfractionated bulk community samples. In addition, the DNA-SIP sequencing effort was directed at a relatively small number of "light" crust samples ( $n = 4$ ), while previous sequencing efforts (Garcia-Pichel *et al.*, 2013; Steven *et al.*, 2013) were spread across hundreds of samples from both "light" and "dark" crusts. Hence, it is likely that the current study will be more likely to detect rare OTUs present in early successional "light" crust communities, particularly those that incorporate  $^{15}\text{N}$  into DNA. In all three BSC studies, most sequences were annotated as either cyanobacteria or *Proteobacteria*, though only in the DNA-SIP data did the sequences of *Proteobacteria* outnumber those of cyanobacteria. *Proteobacteria* represented 29.8% of sequence annotations in DNA-SIP data as opposed to 17.8% and 19.2% for the Garcia-Pichel *et al.* (2013) and Steven *et al.* (2013) data, respectively. In addition, sequences annotated as *Firmicutes* were more abundant in the DNA-SIP data (19%) than in the data from Steven *et al.* (2013) and Garcia-Pichel *et al.* (2013) (0.21% and 0.23%, respectively) (Figure S2). Finally, and congruently with sampling design sequences annotated to "Subsection IV" of cyanobacteria, which encompasses the heterocystous cyanobacteria in the Silva taxonomic nomenclature (Pruesse *et al.*, 2007), comprised only 0.29% of cyanobacteria sequences in the DNA-SIP data

310 while representing 15% and 23% of cyanobacteria sequences from the Steven *et al.* (2013) and  
311 Garcia-Pichel *et al.* (2013) data, respectively.

## 5 DISCUSSION

312 BSC N-fixation has long been attributed to heterocystous cyanobacteria and the preponderance  
313 of cyanobacterial *nifH* genes observed in molecular surveys of BSC have generally supported  
314 this hypothesis (Yeager *et al.*, 2004, 2006, 2012). However, in this study  $^{15}\text{N}_2$ -DNA-SIP reveals  
315 that non-cyanobacterial microorganisms fix  $\text{N}_2$  in early successional BSC samples. *Proteobac-*  
316 *teria* and *Clostridiaceae* were most abundant among  $^{15}\text{N}_2$ -responsive OTUs as revealed by a  
317 robust statistical framework for quantifying and evaluating differential OTU abundance in mi-  
318 crobiome studies (Love *et al.*, 2014; McMurdie and Holmes, 2014). Many of these OTUs (about  
319 40%) have been observed previously in BSC communities. Rarefaction curves of data from  
320 Steven *et al.* (2013) and Garcia-Pichel *et al.* (2013) are still sharply increasing especially for  
321 sub-crust samples (Figure S3) suggesting the communities remain undersampled. Parametric  
322 richness estimates of BSC diversity indicate that the Steven *et al.* (2013) and Garcia-Pichel *et*  
323 *al.* (2013) sequencing efforts recovered on average 40.5% (s.d. 9.99%) and 45.5% (s.d. 11.6%)  
324 of predicted SSU rRNA gene OTUs from crust samples (inset Figure S3), respectively. There-  
325 fore, it would have been surprising if all of the  $^{15}\text{N}$ -responsive OTUs had been observed in prior  
326 environmental surveys of BSC. Nitrogenase *nifH* gene sequences related to both *Proteobacteria*  
327 and *Clostridiaceae* have been previously observed in BSC samples, though typically at relative  
328 abundance that is much lower than *nifH* gene sequences from heterocystous cyanobacteria.

329 Notably, the DNA-SIP analysis did not provide evidence for incorporation of  $^{15}\text{N}_2$  into the  
330 DNA of heterocystous cyanobacteria in the light crust samples after 4 days of incubation. We  
331 propose three mechanisms that could bias *nifH* clone libraries against heterotrophic diazotrophs.  
332 First, extreme polyploidy in cyanobacteria (up to 58x ploidy in stationary phase, (Griese *et al.*,  
333 2011)) can be expected to inflate the representation of cyanobacteria *nifH* gene sequences in  
334 community DNA relative to the frequency of  $^{15}\text{N}_2$ -fixing heterocysts. Although, as spherical  
335 volume scales with radius<sup>3</sup> and cyanobacteria often have relatively large cells, ploidy per cell  
336 is probably much greater than ploidy per unit volume and thus arguably greater than ploidy per  
337 unit  $\text{N}_2$ -fixation. Second, heterocysts make up a small fraction of total cells along a trichome,  
338 though all cells in the trichome possess the *nifH* gene. As a result of polyploidy and heterocyst  
339 frequency in a cyanobacterial filament, the ratio of cyanobacterial *nifH* gene copies to het-  
340 erotrophic *nifH* gene copies may be inflated as much as  $10^3$  times relative to the corresponding  
341 ratio of  $^{15}\text{N}_2$ -fixing cells (i.e. the ratio of heterocyst number to the cell number of heterotrophic

diazotrophs). Third, *nifH* PCR primers, which are highly degenerate, could be biased against heterotrophic diazotrophs. For example, the *nifH* PCR primers used in the second round of a widely used nested PCR protocol (Yeager *et al.*, 2004, 2006, 2012) have fairly low coverage for *Proteobacteria* and *Clostridiales* (Gaby and Buckley, 2012). Primer “nifH11” is biased against “Cluster III” *nifH* gene sequences which includes those of the *Clostridiales* (50% *in silico* coverage of reference *nifH* sequences). In addition, primer “nifH22” has low coverage of reference sequences from *Proteobacteria*, cyanobacteria and “Cluster III” *nifH* gene sequences (16%, 23% and 21% *in silico* coverage, respectively) (Gaby and Buckley, 2012). Hence, it is reasonable to assume that heterotrophic diazotrophs may have been underestimated in previous analyses of early successional BSC communities. Our DNA-SIP results, which do not require PCR of functional genes, suggest that BSC N-fixation in early successional BSC may include a large non-cyanobacterial component. This is consistent with small-scale, spatially resolved functional measurements of nitrogen fixation in BSCs (Johnson *et al.*, 2005) that show a subsurface maximum that does not coincide spatially with maxima in chlorophyll *a* (a proxy for phototrophic biomass) in early-successional crusts, and a surface maximum in fixation of mature crust that coincides with the maximum in chlorophyll *a*.

We did not observe incorporation of  $^{15}\text{N}_2$  into the DNA of heterocystous cyanobacteria in the early successional BSC samples used in this study. It is possible that  $^{15}\text{N}_2$ -fixation by heterocystous cyanobacteria could go undetected in DNA-SIP. One possible explanation for this result is that the early successional BSC samples used in this study possessed too few heterocystous cyanobacteria to statistically evaluate their  $^{15}\text{N}$ -incorporation. Indeed, heterocystous cyanobacteria represented only 0.29% of sequences from the DNA-SIP data (see results) as opposed to 15% and 23% of total sequences in the Steven *et al.* (2013) and Garcia-Pichel *et al.* (2013) data, respectively. OTUs that correspond to heterocystous cyanobacteria (as defined by Yeager *et al.* (2006)), all fall below the sparsity threshold used in our analysis (see methods). Given the sparsity of heterocystous cyanobacteria sequences in the light crust DNA-SIP data, it is not possible to conclusively determine whether heterocystous cyanobacteria incorporated  $^{15}\text{N}$  during the incubation. Our results show that heterotrophic diazotrophs can contribute to  $^{15}\text{N}_2$ -fixation in early successional BSC but they do not exclude the potential for fixation by heterocystous cyanobacteria. Indeed, heterocystous cyanobacteria if present, active, and limited for nitrogen would be expected to form heterocysts and fix  $^{15}\text{N}_2$ . It is likely that scarcity limits their contribution to  $^{15}\text{N}_2$ -fixation in early successional crusts. Heterocystous cyanobacteria form sessile colonies and they require stabilization of the crust environment before they can successfully colonize soil; and this stabilization is performed by other pioneering members of the crust community (Castenholz and Garcia-Pichel, 2002).  $^{15}\text{N}_2$ -DNA-SIP would also fail to



identify  $^{15}\text{N}_2$ -fixing bacteria if  $^{15}\text{N}_2$ -fixation were uncoupled from DNA replication over the time frame of the experiment (i.e. 4 days), that is  $^{15}\text{N}_2$ -DNA-SIP will not detect bacteria that fix  $^{15}\text{N}_2$  but do not incorporate the  $^{15}\text{N}$ -label into DNA. Therefore, the contribution of heterocystous cyanobacteria (or any other microbe) to  $^{15}\text{N}_2$  would be underestimated if their cell division is uncoupled from  $^{15}\text{N}_2$ -fixation at time frames of up to 4 days.

The OTUs with significant evidence of  $^{15}\text{N}$ -incorporation during the incubation were predominantly *Proteobacteria* and *Firmicutes*. The *Proteobacteria* OTUs with the strongest signal of  $^{15}\text{N}$ -incorporation all shared high sequence identity ( $\geq 98.48\%$ ) with SSU rRNA gene sequences from genera known to contain diazotrophs (Table 1). In contrast the *Firmicutes* that displayed signal for  $^{15}\text{N}$ -incorporation (predominantly *Clostridiaceae*) were not closely related to any known cultivars (Table 1). Hence, we have little knowledge of the ecology of these organisms. Assessing the physiological characteristics of these diazotrophic *Clostridiaceae* may be useful for predicting how environmental change will affect the development and stability of BSC. Prior intense cultivation efforts from these crusts in separate studies did not yield any members of the *Clostridiaceae* (Gundlapally and Garcia-Pichel, 2006). Although apparently too undersampled in the environmental data sets available to reach statistical conclusions,  $^{15}\text{N}$ -responsive OTUs were indeed more abundant in sub-crust or in early successional BSC samples as opposed to crust surface or mature crust samples (Figure 3 and Figure S4). While members of *Clostridiaceae* have been found in low abundance in molecular surveys of BSC, most surveys are carried out on dessicated crust samples, where thick-walled spores would predominate relative to vegetative cells, thus increasing the likelihood for their underrepresentation in DNA surveys.

Our results generate more refined hypotheses pertaining to the contribution of diazotrophs during the development of BSC communities. Specifically,  $^{15}\text{N}_2$ -fixation in BSC may not be tied solely to the climax of heterocystous cyanobacteria in mature crusts. Rather,  $^{15}\text{N}_2$ -fixation may occur throughout crust development with the transition between early successional and mature crusts marked by a transition between heterotrophic and phototrophic  $^{15}\text{N}_2$ -fixation in the crust community. Therefore, sub-biocrust soil may contribute significantly to the arid ecosystem N budget and may be of considerable importance in the early phases of BSC establishment. We propose that interactions between fast-growing heterotrophic diazotrophs such as members of the *Clostridiaceae* and filamentous (non-heterocystous) cyanobacteria are important in the early establishment of BSC communities. During progressive dessication, cyanobacteria, such as *M. vaginatus*, accumulate compatible solutes such as trehalose and sucrose (Rajeev et al., 2013). Upon wetting, microorganisms rapidly excrete compatible solutes to prevent cell lysis due to osmotic shock (Poolman and Glaasker, 1998). Among them are dihexoses (such as sucrose and



412 trehalose), which are observed in natural crusts upon wetting and then are rapidly depleted in  
 413 the soil solution (Baran *et al.*, 2014). Many *Clostridiaceae* have a saccharolytic metabolism  
 414 with the potential for rapid growth rates on substrates such as trehalose and/or sucrose (Wiegel  
 415 *et al.*, 2006). Wetting of crust may allow for rapid germination and growth of these organisms  
 416 as the time required for germination of clostridial spores can be less than 30 minutes (Stringer *et*  
 417 *al.*, 2005) Indeed, intense blooms of clostridia have been detected in crusts within tens of hours  
 418 of wetting (Karaoz *et al.*, 2014). N<sub>2</sub> fixing clostridia are common in soils (Wiegel *et al.*, 2006)  
 419 and it is notable that *C. pasteurianum*, isolated from soil, was the first N<sub>2</sub> fixing bacterium  
 420 ever described (Winogradsky, 1895). *C. pasteurianum*, though an anaerobe, grows readily in  
 421 the presence of oxygen when co-cultured with aerobic organisms that reduce oxygen tension  
 422 (Chester, 1903). We propose that during a typical precipitation event, water saturation and het-  
 423 erotrophic activity rapidly render the interior of the crusts anoxic (Garcia-Pichel and Belnap,  
 424 1996) presenting optimal conditions for growth of anaerobic, dihexose-fermenting, N<sub>2</sub> fixing  
 425 clostridia. Clostridial organic nitrogen would then become available to other members of the  
 426 community, including the primary producers, when carbon limitation induces sporulation and  
 427 mother cell lysis. Mother cell lysis, the last step in sporulation, releases rich sources of P and N  
 428 into the environment in the form of nucleotides and peptides (Hoch *et al.*, 2002).

## 5.1 CONCLUSION

429 The abundance of <sup>15</sup>N-responsive OTUs from *Clostridiaceae* and *Proteobacteria* found in this  
 430 study, the *nifH* gene sequences of *Clostridiaceae* and *Proteobacteria* observed previously in  
 431 BSC (Steppe *et al.*, 1996), and the evidence for subsurface N-fixation in early successional  
 432 BSC (Johnson *et al.*, 2005), taken together, suggest that heterotrophic diazotrophs may be im-  
 433 portant contributors to N<sub>2</sub>-fixation in the subsurface of early successional BSC. Heterocystous  
 434 cyanobacteria are also key contributors to the BSC N-budget, however and it is clear that hetero-  
 435 cystous cyanobacteria increase in abundance with BSC age (Yeager *et al.*, 2004). It is less clear  
 436 if the transition to mature crust is marked mainly by a change in the abundance and activity of  
 437 heterocystous cyanobacteria, or rather represents a succession within the diazotroph commu-  
 438 nity from early crusts where <sup>15</sup>N<sub>2</sub>-fixation is dominated by *Clostridiaceae* and *Proteobacteria*  
 439 to mature crusts where it is dominated by heterocystous cyanobacteria. Predicting the ecologi-  
 440 cal response of BSC to climate change, altered precipitation regimes, and physical disturbance  
 441 requires an understanding of crust establishment, stability, and succession. Diazotrophs are crit-  
 442 ical contributors to all of these phenomena and their activities make critical contributions to the  
 443 N-budget of arid ecosystems worldwide.

## 6 ACKNOWLEDGEMENTS

We would like to thank T Whitman, CHD Williamson, AN Campbell and EK Hall for helpful comments in the preparation of this manuscript. This material is based upon work supported by the Department of Energy Office of Science, Office of Biological & Environmental Research Genomic Science Program under Award Numbers DE-SC0004486 and DE-SC0010558. This project was also supported by Agriculture and Food Research Initiative Competitive Grant no. 2007-35107-18299 from the USDA National Institute of Food and Agriculture. This report was prepared as an account of work sponsored by an agency of the United States Government. Neither the United States Government nor any agency thereof, nor any of their employees, makes any warranty, express or implied, or assumes any legal liability or responsibility for the accuracy, completeness, or usefulness of any information, apparatus, product, or process disclosed, or represents that its use would not infringe privately owned rights. Reference herein to any specific commercial product, process, or service by trade name, trademark, manufacturer, or otherwise does not necessarily constitute or imply its endorsement, recommendation, or favoring by the United States Government or any agency thereof. The views and opinions of authors expressed herein do not necessarily state or reflect those of the United States Government or any agency thereof.

## 7 CONFLICT OF INTEREST

The authors declare no conflict of interest.

## REFERENCES

- Anderson M. (2001). A new method for non-parametric multivariate analysis of variance. *Austral Ecology* 26: 32–46.
- Baran R, Brodie E, Mayberry-Lewis J, Nunes Da Rocha U, Bowen B, Karaoz U *et al.* (2014). personal communication.
- Belnap J. (2001). Factors influencing nitrogen fixation and nitrogen release in biological soil crusts. In: Belnap J, Lange O (eds.) *Biological soil crusts: structure function, and management*. Vol. 150. Ecological Studies. Springer: Berlin Heidelberg, pp. 241–261.
- Belnap J. (2002). Nitrogen fixation in biological soil crusts from southeast Utah USA *Biol Fert Soils* 35: 128–135.

- 470 Belnap J. (2003). Factors influencing nitrogen fixation and nitrogen release in biological  
471 soil crusts. In: Belnap J, Lange O (eds.) Biological soil crusts: structure, function, and  
472 management. Vol. 150. Ecological Studies. Springer: Berlin Heidelberg, pp. 241–261.
- 473 Belnap J, Prasse R, Harper K. (2003). Influence of biological soil crusts on soil environments  
474 and vascular plants. In: Belnap J, Lange O (eds.) Biological soil crusts: structure, function,  
475 and management. Vol. 150. Ecological Studies. Springer: Berlin Heidelberg, pp. 281–300.
- 476 Benjamini Y, Hochberg Y. (1995). Controlling the false discovery rate: a practical and powerful  
477 approach to multiple testing. J R Stat Soc Series B Stat Methodol 57: 289–300.
- 478 Beraldi-Campesi H, Hartnett H, Anbar A, Gordon G, Garcia-Pichel F. (2009). Effect of bio-  
479 logical soil crusts on soil elemental concentrations: implications for biogeochemistry and as  
480 traceable biosignatures of ancient life on land. Geobiology 7: 348–359.
- 481 Bray J, Curtis J. (1957). An ordination of the upland forest communities of southern Wisconsin.  
482 Ecol Monograph 27: 325.
- 483 Buckley D. (2011). Stable isotope probing techniques using  $^{15}\text{N}$  In: Murrell J, Whiteley A  
484 (eds.) Stable isotope probing and related technologies. American Society of Microbiology  
485 Press: Washington. DC pp. 129–147.
- 486 Buckley D, Huangyutitham V, Hsu S, Nelson T. (2007). Stable isotope probing with  $^{15}\text{N}_2$   
487 reveals novel noncultivated diazotrophs in soil. Appl Environ Microbiol 73: 3196–3204.
- 488 Bunge J. (2010). Estimating the number of species with Catchall. In: Altman R, Dunker, L H,  
489 Murray T, Klein T (eds.) Biocomputing 2011. World Scientific: Hackensack, NJ pp. 121–130.
- 490 Camacho C, Coulouris G, Avagyan V, Ma N, Papadopoulos J, Bealer K *et al.*. (2009). BLAST+:  
491 Architecture and applications. BMC Bioinformatics 10: 421.
- 492 Caporaso J, Kuczynski J, Stombaugh J, Bittinger K, Bushman F, Costello E *et al.*. (2010).  
493 QIIME allows analysis of high-throughput community sequencing data. Nat Methods 7: 335–  
494 336.
- 495 Castenholz RW, Garcia-Pichel F. (2002). Cyanobacterial Responses to UV-radiation. In: Whit-  
496 ton B, Potts M (eds.) The ecology of cyanobacteria. Springer: Netherlands, pp. 591–  
497 611.
- 498 Chester F. (1903). Oligonitrophilic bacteria of the soil. Science. 370–371.
- 499 Cock P, Antao T, Chang J, Chapman B, Cox C, Dalke A *et al.*. (2009). Biopython: Freely avail-  
500 able Python tools for computational molecular biology and bioinformatics. Bioinformatics 25:  
501 1422–1423.
- 502 DeSantis TJ, Hugenholtz P, Keller K, Brodie E, Larsen N, Piceno Y *et al.*. (2006). NAST: a  
503 multiple sequence alignment server for comparative analysis of 16S rRNA genes. Nucleic  
504 Acids Res 34: W394–W399.

- 505 Edgar R. (2010). Search and clustering orders of magnitude faster than BLAST. *Bioinformatics*  
506 26: 2460–2461.
- 507 Edgar R. (2013). UPARSE: highly accurate OTU sequences from microbial amplicon reads.  
508 *Nat Methods* 10: 996–998.
- 509 Evans R, Belnap J. (1999). Long-term consequences of disturbance on nitrogen dynamics in an  
510 arid ecosystem. *Ecology* 80: 150–160.
- 511 Evans R, Lange O. (2001). Biological soil crusts and ecosystem nitrogen and carbon dynam-  
512 ics. In: Belnap J, Lange O (eds.) *Biological soil crusts: structure function, and management*.  
513 Vol. 150. *Ecological Studies*. Springer: Berlin Heidelberg, pp. 263–279.
- 514 Gaby J, Buckley D. (2012). A comprehensive evaluation of PCR primers to amplify the *nifH*  
515 Gene of nitrogenase. *PLoS ONE* 7: e42149.
- 516 Garcia-Pichel F, Belnap J, Neuer S, Schanz F. (2003a). Estimates of global cyanobacterial  
517 biomass and its distribution. *Algol Stud* 109: 213–227.
- 518 Garcia-Pichel F, Johnson S, Youngkin D, Belnap J. (2003b). Small-scale vertical distribution  
519 of bacterial biomass and diversity in biological soil crusts from arid lands in the Colorado  
520 Plateau. *Microb Ecol* 46: 312–321.
- 521 Garcia-Pichel F, Loza V, Marusenko Y, Mateo P, Potrafka R. (2013). Temperature drives the  
522 continental-scale distribution of key microbes in topsoil communities. *Science* 340: 1574–  
523 1577.
- 524 Garcia-Pichel F, Belnap J. (1996). Microenvironments and microscale productivity of  
525 cyanobacterial desert crusts. *J Phycol* 32: 774–782.
- 526 Garcia-Pichel F, Wojciechowski MF. (2009). The evolution of a capacity to build supra-cellular  
527 ropes enabled filamentous cyanobacteria to colonize highly erodible substrates. *PLoS ONE* 4:  
528 e7801.
- 529 Griesse M, Lange C, Soppa J. (2011). Ploidy in cyanobacteria. *FEMS Microbiol Lett* 323: 124–  
530 131.
- 531 Gundlapally SR, Garcia-Pichel F. (2006). The community and phylogenetic diversity of bio-  
532 logical soil crusts in the colorado plateau studied by molecular fingerprinting and intensive  
533 cultivation. *Microb Ecol* 52: 345–357.
- 534 Hoch J, Sonenshein A, Losick R. (2002). *Bacillus subtilis*: From cells to genes and from genes  
535 to cells. In: Sonenshein A, Hoch J, Losick R (eds.) *Bacillus subtilis and its closest relatives*.  
536 American Society of Microbiology: Washington, DC
- 537 Johnson SL, Neuer S, Garcia-Pichel F. (2007). Export of nitrogenous compounds due to in-  
538 complete cycling within biological soil crusts of arid lands. *Environ Microbiol* 9: 680–  
539 689.

- 540 Johnson S, Budinoff C, Belnap J, Garcia-Pichel F. (2005). Relevance of ammonium oxidation  
541 within biological soil crust communities. *Environ Microbiol* 7: 1–12.
- 542 Karaoz U, Estelle C, Nunes Da Rocha U, Northen T, Garcia-Pichel F, Brodie E. (2014). in  
543 preparation.
- 544 Karnieli A, Kokaly R, West N, Clark R. (2003). Remote sensing of biological soil crusts. In:  
545 Belnap J, Lange O (eds.) *Biological soil crusts: structure, function, and management*. Vol. 150.  
546 *Ecological Studies*. Springer: Berlin Heidelberg, pp. 431–455.
- 547 Knight R, Maxwell P, Birmingham A, Carnes J, Caporaso J, Easton B *et al.*. (2007). PyCogent:  
548 A toolkit for making sense from sequence. *Genome Biol* 8: R171.
- 549 Love MI, Huber W, Anders S. (2014). Moderated estimation of fold change and dispersion for  
550 RNA-Seq data with DESeq2. *bioRxiv*.
- 551 McKinney W. (2012). *pandas: Python data analysis library*. Online. URL: <http://pandas.pydata.org/>.
- 552 [pydata.org/](http://pandas.pydata.org/).
- 553 McMurdie P, Holmes S. (2014). Waste not, want not: why rarefying microbiome data is  
554 inadmissible. *PLoS Comput Biology* 10: e1003531.
- 555 Nawrocki E, Eddy S. (2013). Infernal 1.1: 100-fold faster RNA homology searches. *Bioinform-*  
556 *atics* 29: 2933–2935.
- 557 Nawrocki E, Kolbe D, Eddy S. (2009). Infernal 1.0: inference of RNA alignments. *Bioinform-*  
558 *atics* 25: 1335–1337.
- 559 Neufeld J, Vohra J, Dumont M, Lueders T, Manefield M, Friedrich M *et al.*. (2007). DNA  
560 stable-isotope probing. *Nat Protoc* 2: 860–866.
- 561 Oksanen J, Blanchet F, Kindt R, Legendre P, Minchia nP, O’Hara R *et al.*. (2013). *vegan: Com-*  
562 *munity ecology package*. R package version 2.0-10. URL: <http://CRAN.R-project.org/package=vegan>.
- 563 [org/package=vegan](http://CRAN.R-project.org/package=vegan).
- 564 Poolman B, Glaasker E. (1998). Regulation of compatible solute accumulation in bacteria. *Mol*  
565 *Microbiol* 29: 397–407.
- 566 Price M, Dehal P, Arkin A. (2010). FastTree 2—approximately maximum-likelihood trees for  
567 large alignments. *PLoS One* 5: e9490.
- 568 Pruesse E, Quast C, Knittel K, Fuchs B, Ludwig W, Peplies J *et al.*. (2007). SILVA: a com-  
569 prehensive online resource for quality checked and aligned ribosomal RNA sequence data  
570 compatible with ARB. *Nucleic Acids Res* 35: 7188–7196.
- 571 Radajewski S, Murrell J. (2001). Stable isotope probing for detection of methanotrophs after  
572 enrichment with <sup>13</sup>CH<sub>4</sub>. In: *Gene probes*. Humana Press: New York, pp. 149–157.

- 573 Rajeev L, Rocha UN da, Klitgord N, Luning EG, Fortney J, Axen SD *et al.*. (2013). Dynamic  
574 cyanobacterial response to hydration and dehydration in a desert biological soil crust. ISME J  
575 7: 2178–2191.
- 576 Schloss P, Westcott S, Ryabin T, Hall J, Hartmann M, Hollister E *et al.*. (2009). Introducing  
577 Mothur: open-source, platform-independent, community-supported software for describing  
578 and comparing microbial communities. Appl Environ Microbiol 75: 7537–7541.
- 579 Starkenburg SR, Reitenga KG, Freitas T, Johnson S, Chain PSG, Garcia-Pichel F *et al.*. (2011).  
580 Genome of the cyanobacterium *Microcoleus vaginatus* FGP-2 a photosynthetic ecosystem  
581 engineer of arid land soil biocrusts worldwide. J Bacteriol 193: 4569–4570.
- 582 Steppe T, Olson J, Paerl H, Litaker R, Belnap J. (1996). Consortial N<sub>2</sub> fixation: a strategy for  
583 meeting nitrogen requirements of marine and terrestrial cyanobacterial mats. FEMS Microbiol  
584 Ecol 21: 149–156.
- 585 Steven B, Gallegos-Graves L, Belnap J, Kuske C. (2013). Dryland soil microbial communities  
586 display spatial biogeographic patterns associated with soil depth and soil parent material.  
587 FEMS Microbiol Ecol 86: 101–113.
- 588 Stringer SC, Webb MD, George SM, Pin C, Peck MW. (2005). Heterogeneity of times required  
589 for germination and outgrowth from single spores of nonproteolytic *Clostridium botulinum*.  
590 Appl Environ Microbiol 71: 4998–5003.
- 591 Walters W, Caporaso J, Lauber C, Berg-Lyons D, Fierer N, Knight R. (2011). PrimerProspec-  
592 tor: de novo design and taxonomic analysis of barcoded polymerase chain reaction primers.  
593 Bioinformatics 27: 1159–1161.
- 594 Wickham H. (2009). ggplot2: elegant graphics for data analysis. Springer: New York.
- 595 Wickham H, Francois R. (2014). dplyr: dplyr: a grammar of data manipulation. R package.  
596 URL: <http://CRAN.R-project.org/package=dplyr>.
- 597 Wiegand J, Tanner R, Rainey F. (2006). An introduction to the family clostridiaceae. In: Rosen-  
598 berg E, DeLong E, Lory S, Stackebrandt E, Thompson F (eds.) The prokaryotes. Springer:  
599 US pp. 654–678.
- 600 Winogradsky S. (1895). Recherches sur l'assimilation de l'azote libre de l'atmosphère par les  
601 microbes. Arch. d. Sci. Biol. 4: 297.
- 602 Yarza P, Richter M, Peplies J, Euzéby J, Amann R, Schleifer K *et al.*. (2008). The All-Species  
603 Living Tree project: A 16S rRNA-based phylogenetic tree of all sequenced type strains. Syst  
604 Appl Microbiol 31: 241–250.
- 605 Yeager C, Kornosky J, Housman D, Grote E, Belnap J, Kuske C. (2004). Diazotrophic com-  
606 munity structure and function in two successional stages of biological soil crusts from the  
607 Colorado Plateau and Chihuahuan Desert. Appl Environ Microbiol 70: 973–983.



- 
- 608 Yeager C, Kornosky J, Morgan R, Cain E, Garcia-Pichel F, Housman D *et al.*. (2006). Three  
609 distinct clades of cultured heterocystous cyanobacteria constitute the dominant N<sub>2</sub>-fixing  
610 members of biological soil crusts of the Colorado Plateau USA FEMS Microbiol Ecol 60:  
611 85–97.
- 612 Yeager C, Kuske C, Carney T, Johnson S, Ticknor L, Belnap J. (2012). Response of biolog-  
613 ical soil crust diazotrophs to season altered summer precipitation, and year-round increased  
614 temperature in an arid grassland of the Colorado Plateau, USA Front Microbiol 3:
- 615 Youngblut N, Buckley D.. Intra-genomic variation in G+C content and its implications for DNA  
616 stable isotope probing (DNA-SIP). Environ Microbiol Rep; epub ahead of print 2014 Aug 19,  
617 doi 10.1111/1758-2229.12201.

## 8 TITLES AND LEGENDS TO FIGURES

### Figure 1

Ordination of heavy gradient fractions by Bray-Curtis distances on the basis of OTU content.

### Figure 2

Moderated log<sub>2</sub> fold change of OTUs proportions for labeled versus control gradients (heavy fractions only, densities >1.725 g/mL). All OTUs passing the sparsity threshold (see methods) at a specific incubation day are shown. Red color denotes a proportion fold change that has a corresponding adjusted p-value below a false discovery rate of 10% (ratio is significantly greater than 0.25, black line.)

### Figure 3

Phylogenetic trees of OTUs passing sparsity threshold for *Proteobacteria* **A** and *Firmicutes* **B**. <sup>15</sup>N-responders are identified by dots present in column **i**. Log<sub>2</sub> of OTU proportion fold change (labeled:control samples) for each OTU are presented as a heatmap in column **ii** with results from days 2 and 4 on the left and right sides of the column respectively. High fold change values indicate <sup>15</sup>N incorporation. Presence/absence of OTUs (black indicates presence) in lichen, light, or dark environmental samples (Garcia-Pichel *et al.*, 2013) is shown in column **iii**. Presence/absence of OTUs (black indicates presence) in crust and below crust samples (Steven *et al.*, 2013) is shown in column **iv**.

### Figure 4

Relative abundance values in heavy fractions (density greater or equal to 1.725 g/mL) for the top 10 <sup>15</sup>N "responders" (putative diazotrophs, see results for selection criteria of top 10) at each incubation day. See Table 1 for BLAST results against the LTP database (release 115). Point area is proportional to CsCl gradient fraction density, and color signifies control (red) or labeled (blue) treatment.

### Figure S1

Ordination of Bray-Curtis sample pairwise distances for each incubation time. Point area is proportional to the density of the CsCl gradient fraction for each sequence library, and color/shape reflects control (red triangles) or labeled (blue circles) treatment.

### Figure S2

Distribution of sequences into top 9 phyla (phyla ranked by sum of all sequence annotations).

### Figure S3

Rarefaction curves for all samples presented by Garcia-Pichel *et al.* (2013) and Steven *et al.* (2013) Inset is boxplot of estimated sampling effort for all samples in Garcia-Pichel *et al.* (2013) and Steven *et al.* (2013) (number of observed OTUs divided by number of CatchAll (Bunge, 2010) estimated total OTUs)

652 **Figure S4**  
 653 Counts of "responder" OTU occurrences in samples from Steven *et al.* (2013) and Garcia-Pichel  
 654 *et al.* (2013) Steven *et al.* (2013) collected BSC samples (25 samples total) and samples from  
 655 soil beneath BSC (17 samples total, "below" column in figure). Garcia-Pichel *et al.* (2013) col-  
 656 lected samples from "dark" (9 samples total) and "light" (12 samples total) crusts in addition to  
 657 "Lichen" (2 samples total) dominated crusts.

## 9 FIGURES AND LONG TABLES

658 **Table 1.** <sup>15</sup>N responders BLAST search against Living Tree Project. Genera of all top BLAST  
659 hits are shown. Top 10 indicates responder was among top 10 most enriched OTUs in labeled  
660 gradient heavy fractions relative to corresponding control heavy fractions

| OTU ID   | Genera                                                                    | BLAST %ID | Top 10? | Phylum                  |
|----------|---------------------------------------------------------------------------|-----------|---------|-------------------------|
| OTU.108  | <i>Caloramator</i>                                                        | 96.94     | no      | <i>Firmicutes</i>       |
| OTU.1276 | <i>Agromyces</i>                                                          | 99.49     | yes     | <i>Actinobacteria</i>   |
| OTU.137  | <i>Azospirillum</i>                                                       | 99.48     | no      | <i>Proteobacteria</i>   |
| OTU.14   | <i>Klebsiella, Kluyvera, Erwinia, Enterobacter, Pantoea, Buttiauxella</i> | 99.49     | yes     | <i>Proteobacteria</i>   |
| OTU.140  | <i>Bacillus</i>                                                           | 100.0     | no      | <i>Firmicutes</i>       |
| OTU.1673 | <i>Clostridium</i>                                                        | 95.9      | no      | <i>Firmicutes</i>       |
| OTU.176  | <i>Delftia</i>                                                            | 100.0     | no      | <i>Proteobacteria</i>   |
| OTU.2036 | <i>Pseudomonas</i>                                                        | 99.49     | yes     | <i>Proteobacteria</i>   |
| OTU.227  | <i>Cellulosilyticum</i>                                                   | 93.4      | no      | <i>Firmicutes</i>       |
| OTU.243  | <i>Bacillus</i>                                                           | 98.98     | no      | <i>Firmicutes</i>       |
| OTU.259  | <i>Parasporobacterium</i>                                                 | 98.47     | no      | <i>Firmicutes</i>       |
| OTU.263  | <i>Azospirillum</i>                                                       | 98.48     | no      | <i>Proteobacteria</i>   |
| OTU.278  | <i>Symbiobacterium</i>                                                    | 90.62     | no      | <i>Firmicutes</i>       |
| OTU.2794 | <i>Enterobacter</i>                                                       | 100.0     | no      | <i>Proteobacteria</i>   |
| OTU.282  | <i>Nocardia, Rhodococcus</i>                                              | 100.0     | no      | <i>Actinobacteria</i>   |
| OTU.3    | <i>Bacillus</i>                                                           | 100.0     | no      | <i>Firmicutes</i>       |
| OTU.321  | <i>Pseudomonas</i>                                                        | 100.0     | yes     | <i>Proteobacteria</i>   |
| OTU.327  | <i>Clostridium</i>                                                        | 94.92     | no      | <i>Firmicutes</i>       |
| OTU.330  | <i>Clostridium</i>                                                        | 96.94     | yes     | <i>Firmicutes</i>       |
| OTU.342  | <i>Acinetobacter</i>                                                      | 100.0     | no      | <i>Proteobacteria</i>   |
| OTU.3712 | <i>Clostridium, Eubacterium</i>                                           | 96.43     | no      | <i>Firmicutes</i>       |
| OTU.4037 | <i>Fonticella</i>                                                         | 93.85     | no      | <i>Firmicutes</i>       |
| OTU.4167 | <i>Fonticella</i>                                                         | 93.43     | no      | <i>Firmicutes</i>       |
| OTU.419  | <i>Caloramator</i>                                                        | 93.88     | no      | <i>Firmicutes</i>       |
| OTU.470  | <i>Gemmatimonas</i>                                                       | 85.86     | yes     | <i>Gemmatimonadetes</i> |
| OTU.528  | <i>Clostridium</i>                                                        | 95.38     | yes     | <i>Firmicutes</i>       |
| OTU.54   | <i>Shigella, Escherichia</i>                                              | 100.0     | yes     | <i>Proteobacteria</i>   |
| OTU.57   | <i>Fonticella, Caloramator</i>                                            | 93.88     | no      | <i>Firmicutes</i>       |
| OTU.586  | <i>Ottowia, Diaphorobacter, Ideonella, Vitreoscilla, Comamonas</i>        | 98.48     | no      | <i>Proteobacteria</i>   |
| OTU.61   | <i>Clostridium</i>                                                        | 95.92     | no      | <i>Firmicutes</i>       |
| OTU.643  | <i>Clostridium</i>                                                        | 97.45     | no      | <i>Firmicutes</i>       |
| OTU.647  | <i>Magnetospirillum</i>                                                   | 99.48     | no      | <i>Proteobacteria</i>   |

**Table 1 – continued from previous page**

| OTU ID  | Genera               | BLAST %ID | Top 10? | Phylum                |
|---------|----------------------|-----------|---------|-----------------------|
| OTU.697 | <i>Pseudomonas</i>   | 98.47     | yes     | <i>Proteobacteria</i> |
| OTU.761 | <i>Gracilibacter</i> | 93.91     | yes     | <i>Firmicutes</i>     |

Figure 1.

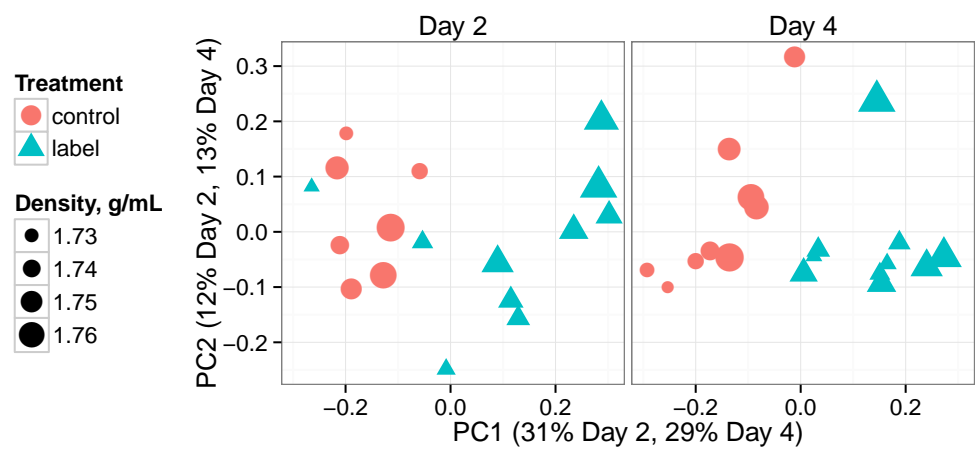



Figure 2.

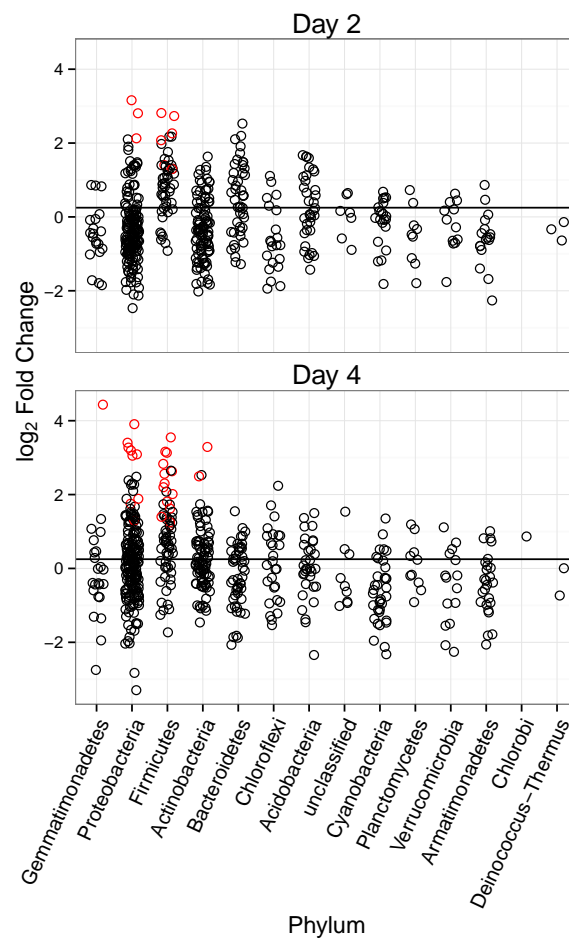

Figure 3.

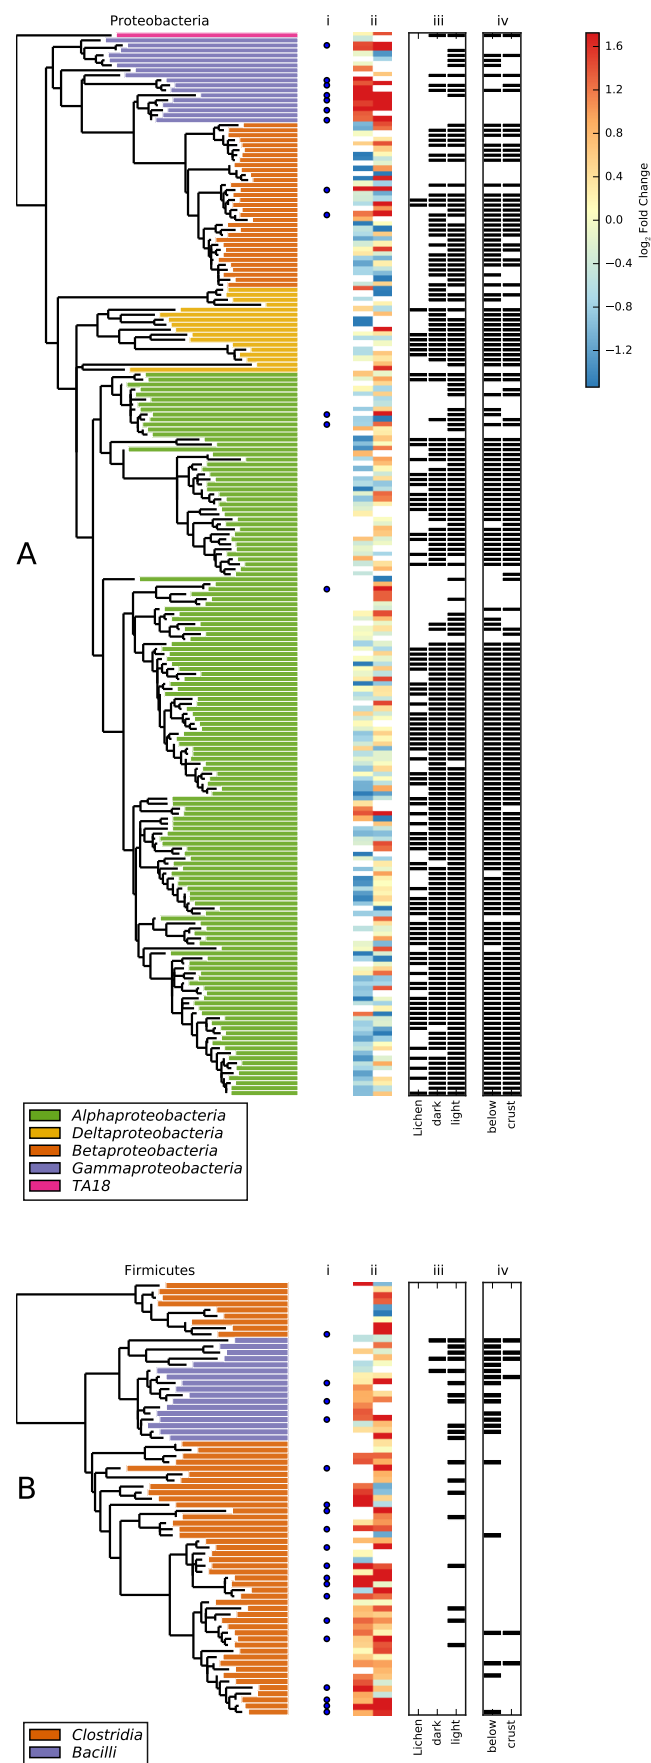

Figure 4.

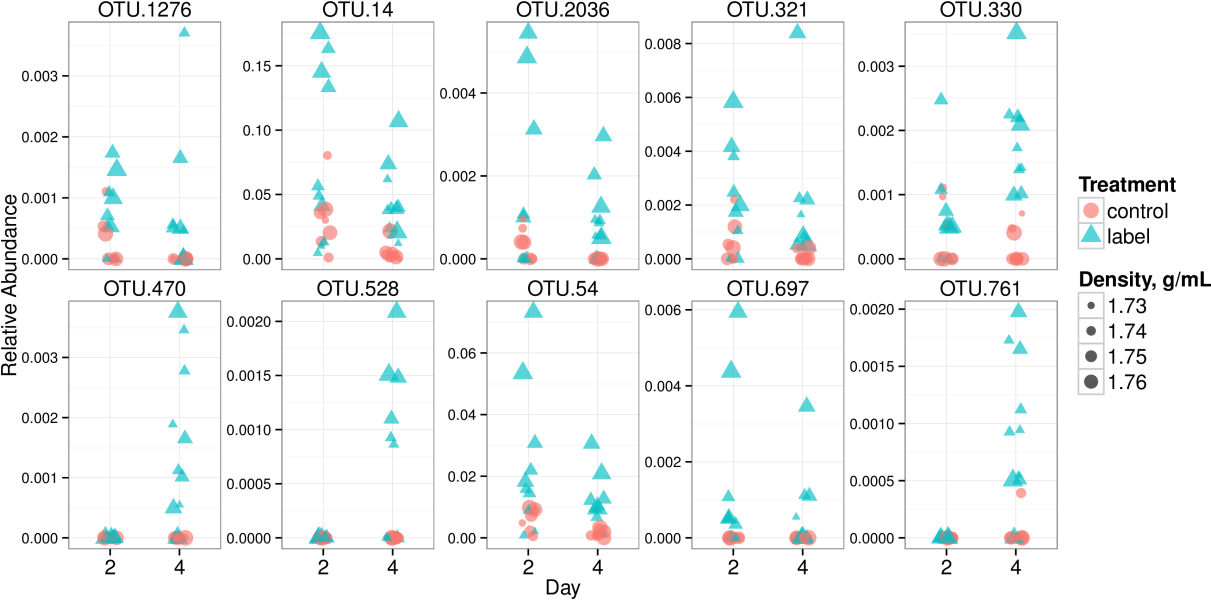

## 10 SUPPLEMENTAL FIGURES

Figure S1.

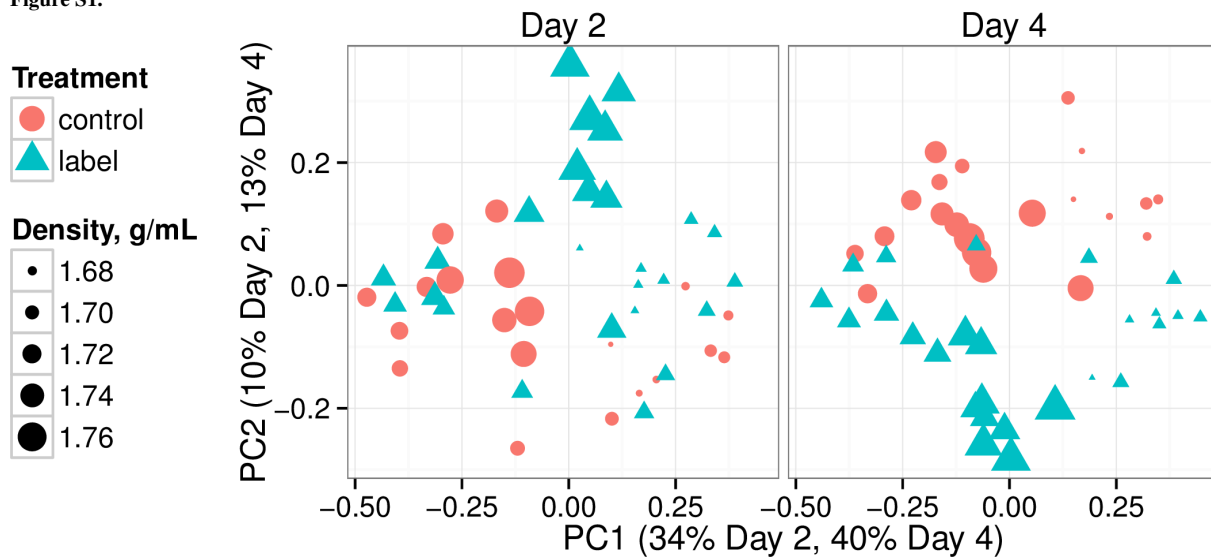

**Figure S2.**

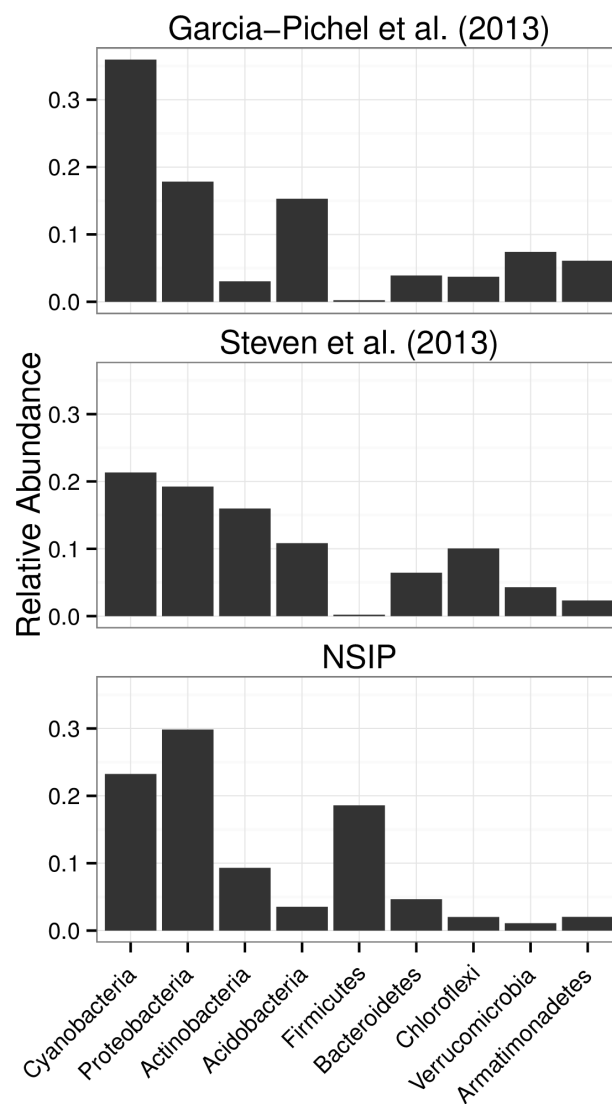

**Figure S3.**

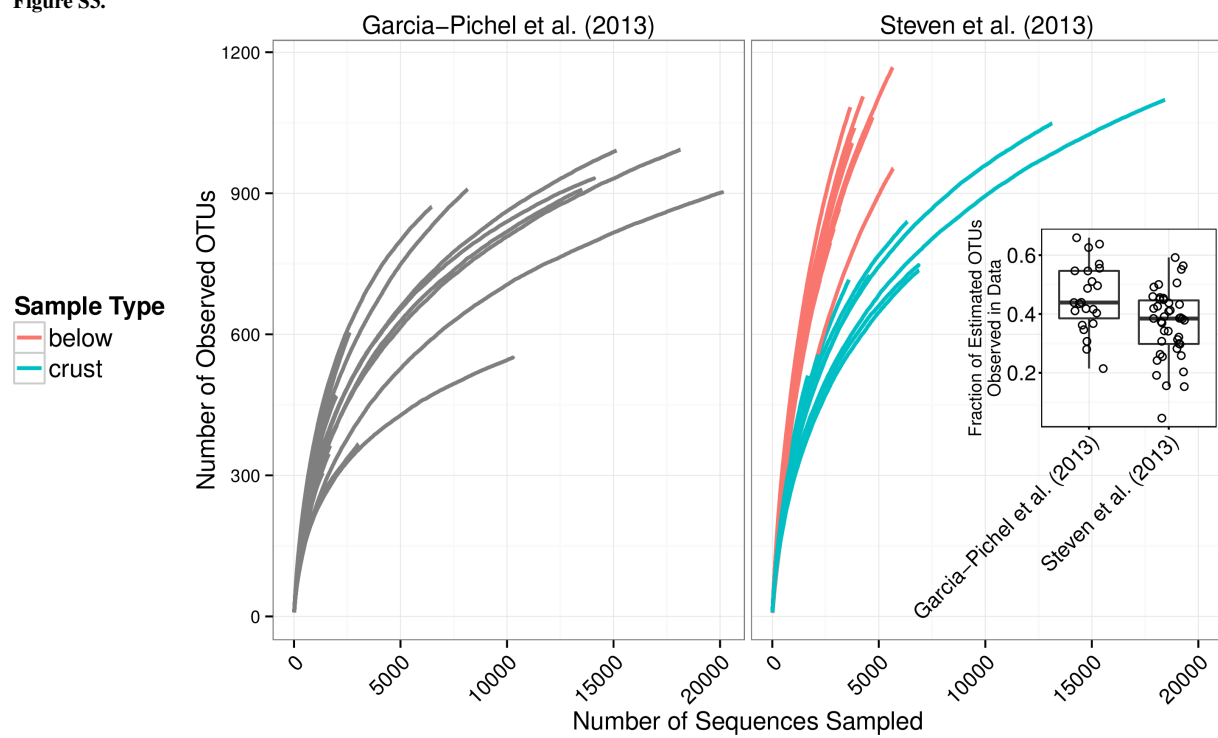



Figure S4.

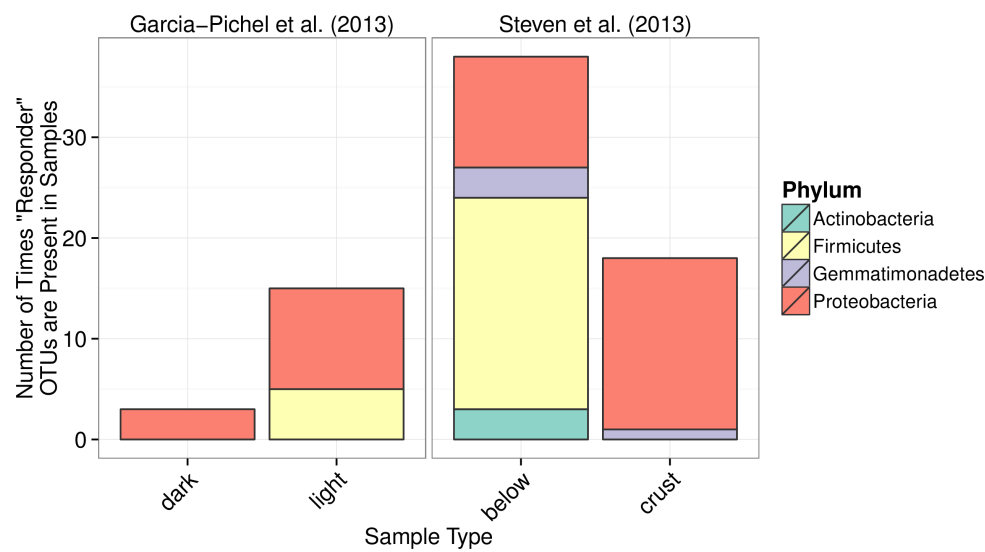

Source: http://biorxiv.org/content/10.1101/013813v1.full.pdf
